# Supplementary material
Source: Springer Nature journal article supplement (https://www.springermedizin.de/resource/supplementary/12937_2014_847_MOESM1_ESM.pdf/25653942)

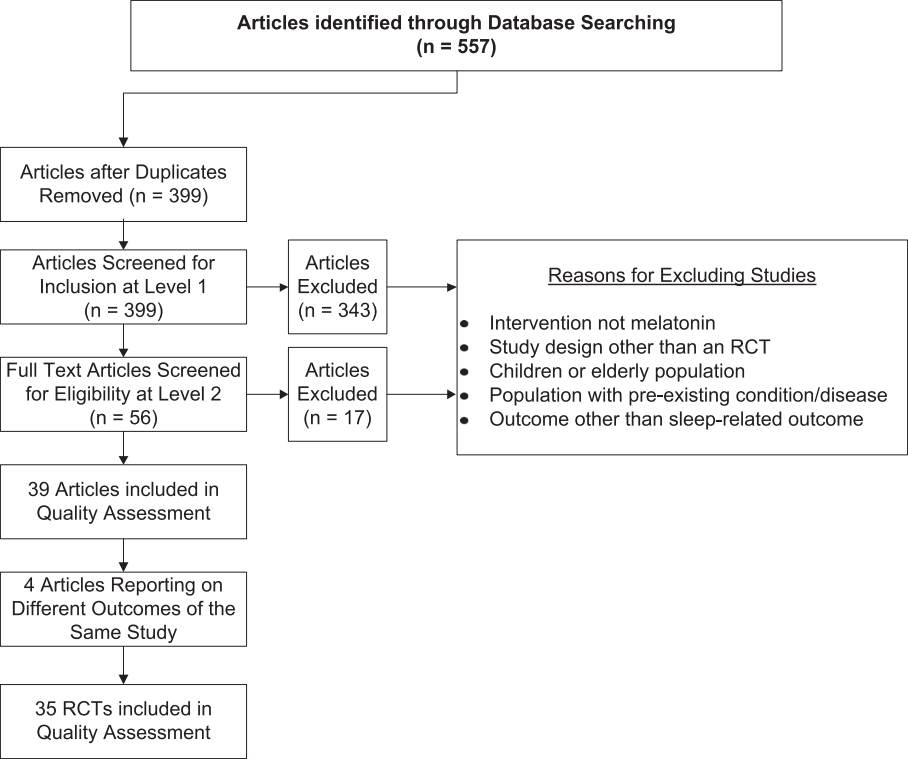

Supplement: MOESM1 [file 25653942]
